1 **Long-term impact of intensive postgraduate laboratory training at the Cold Spring**

2 **Harbor Neurobiology of *Drosophila* summer course**

3

4

5 Sarah Ly<sup>1</sup>, Karla Kaun<sup>2</sup>, Chi-Hon Lee<sup>3</sup>, David Stewart<sup>4</sup>, Stefan R. Pulver<sup>5</sup>, and Alex C.

6 Keene<sup>6#</sup>

7

8

9 1. Center for Sleep and Circadian Neurobiology, University of Pennsylvania,  
10 Philadelphia, PA 19146

11 2. Department of Neuroscience, Brown University, Providence, RI 02912

12 3. Institute of Cellular and Organismic Biology, Academia Sinica, Taipei, Taiwan, 11529

13 4. Cold Spring Harbor Laboratory, 1 Bungtown Road, Cold Spring Harbor, NY, 11724

14 5. School of Psychology and Neuroscience, University of St. Andrews, Fife, Scotland,

15 KY16 9AJ

16 6. Department of Biological Sciences, Florida Atlantic University, Jupiter, FL 33401

17

18 # address correspondence to [sp96@st-andrews.ac.uk](mailto:sp96@st-andrews.ac.uk) and [KeeneA@FAU.edu](mailto:KeeneA@FAU.edu)

19

20 **Abstract**

21

22 Intensive postgraduate courses provide an opportunity for junior and senior level  
23 scientists to learn concepts and techniques that will advance their training and research  
24 programs. It is commonly assumed that short intensive courses have positive impacts  
25 within fields of research; however, these assumptions are rarely tested. Here we  
26 describe the framework of a long running postgraduate summer course at Cold Spring  
27 Harbor and attempt to quantify the impact made over its history. For over three decades,  
28 the *Drosophila* Neurobiology: Genes, Circuits & Behavior Summer Course at Cold  
29 Spring Harbor Laboratories (CSHL) has provided participants with intense instruction on  
30 a wide variety of topics and techniques in integrative neuroscience using *Drosophila* as a  
31 model organism. Students are introduced to the latest approaches for studying nervous  
32 system development, activity and connectivity, as well as complex behaviors and  
33 diseases. The course has a long history of successful alumni, many of whom describe  
34 participation in the course as foundational to their training. Student surveys of recent  
35 participants indicate a high level of satisfaction, improved career outcomes, and direct  
36 impact on publications. Analysis of student success reveals that over 64% of participants  
37 obtain independent faculty positions. Further, we describe ongoing efforts to enhance  
38 diversity and encourage access to scientific research at undergraduate-focused  
39 institutions. Together, our findings suggest that laboratory-intensive postgraduate  
40 courses provide a highly effective mechanism for scientific training that has lasting  
41 positive impacts on trainees.

42

43

## 44 INTRODUCTION

45 Research on the fruit fly, *Drosophila melanogaster*, has played an important role in  
46 uncovering principles of nervous system structure and function. Fundamental insights  
47 include the first molecular descriptions of nervous system differentiation (reviewed in  
48 [1]), the identification and elucidation of axon guidance cues (reviewed in [2]), the first  
49 cloning of ion channels (reviewed in [3]), the first demonstration that SNARE proteins are  
50 required for chemical neurotransmission (reviewed in [4]), and the identification of single  
51 genes that regulate complex behavior (reviewed in [5–7]). More recent advances have  
52 been focused on neural circuit function and the neuronal basis for complex behavior  
53 (reviewed in [8]). *Drosophila* often leads the way in the development of genetic  
54 technologies for identifying, manipulating and monitoring neural circuits [9]. Furthermore,  
55 complex behaviors, including learning, decision-making, feeding, circadian rhythms,  
56 arousal/sleep, aggression, courtship, and addiction are now amenable to sophisticated  
57 experimental analysis. Increasingly, a comprehensive understanding of the functional  
58 connections between genes, proteins, neural circuits, and emergent behaviors is  
59 attainable [10–14]. Importantly, conservation of both the genes that underlie circuit  
60 formation and function as well as the information-processing logic of neural circuits  
61 means that discoveries and technologies developed in *Drosophila* are often readily  
62 translated into insights that directly inform research in mammalian systems [7, 15–17].

63

64 The growing diversity of genetic approaches and specialization of individual laboratories  
65 presents a notable impediment to scientific training. Creative and novel scientific  
66 approaches require a familiarity with cutting-edge genetic technology and approaches in  
67 model organisms, yet this type of specialized coursework is not provided in most  
68 laboratories or training programs. Laboratory-intensive courses provide trainees with  
69 rigorous experimental training that includes exposure to research areas and techniques

70 that may not be available at their host institution. These field-specific courses are offered  
71 at institutions throughout the world, and are widely viewed as critical aspects of training  
72 for the scientific community. Although numerous descriptive reports have been written  
73 about the structure of various courses [18–21], understanding the true impact of these  
74 courses requires a quantitative assessment of course efficacy and student satisfaction  
75 that has yet to be conducted.

76

77 Max Delbruck organized the first modern course in Bacterial Viruses at Cold Spring  
78 Harbor Laboratory (CSHL). The objective was to create a large group of research  
79 workers of diverse backgrounds who were indoctrinated in the biological side of  
80 bacteriophage research and could work in a somewhat loose collaboration to explore  
81 this most promising field. The basic philosophy of this course included learning science  
82 by doing science, and of total immersion in the concepts and techniques of a new field.  
83 This philosophy has remained the cornerstone of CSHL postgraduate courses to the  
84 present date; its' impact has been enormous, and has inspired fundamental concepts  
85 within the field of molecular biology. Modern neuroscience courses began at CSHL in  
86 1981 with a course on Single Channel Recording, which was established shortly after  
87 Erwin Neher and Bert Sakmann first demonstrated the Nobel prize winning  
88 methodology.

89

90 In the 1970s, CSHL began offering several Neurobiology of *Drosophila* workshops that  
91 included contributions from many early leaders in the field including Bill Pak, Chun-Fang  
92 Wu, and Bob Horovitz. These workshops in the early days of *Drosophila* neurogenetics  
93 undoubtedly had an outsized role on the trajectory of the field and development of  
94 community that continues to endure today [22]. In 1984, the workshop was fully  
95 revamped to capture the incredible changes in the scientific landscape and was the birth

96 of our present day — and longtime running — fly course. In 1984, an annual course  
97 focused on the nervous system of the fruit fly, *Drosophila melanogaster* was formalized.  
98 The course was offered under the direction of Ralph Greenspan, Lily Jan, Yuh-Nung Jan  
99 and Patrick O'Farrell. The course has now run without interruption for 35 years. Each  
100 year, approximately 12 trainees are selected through a competitive admission process to  
101 participate in the three-week course, which is led by instructors from diverse  
102 backgrounds. Many of these trainees have gone on to become leaders in the field.  
103 Here, we describe the current course structure in the context of past course highlights  
104 and provide a systematic analysis of student satisfaction and the long-term career  
105 success of course participants. Our analysis reveals remarkable sustained achievement  
106 of course alumni, thus highlighting the potential of similar courses to catalyze scientific  
107 impact and promote diversity within the scientific community.

108

## 109 **METHODS**

### 110 **Course Structure**

111 The CSHL *Drosophila* neurobiology laboratory and lecture course is intended for  
112 researchers at all levels who want to use *Drosophila* as an experimental system to study  
113 the nervous system. Students of the course learn how to examine the larval and adult  
114 *Drosophila* nervous systems to study development, neurophysiology, neuroanatomy,  
115 and behavior. Students learn a wide range of methods and experimental approaches  
116 including genetic, electrophysiological, imaging and behavioral techniques. The course  
117 is actively designed to balance in-depth training with an expanded breadth of topics.  
118 Daily seminars introduce the history behind special topics in *Drosophila* research while  
119 providing updated current knowledge by expounding upon recent contributions to the  
120 literature and generating interactive discussions about outstanding questions in the field.  
121 Student discussion is actively encouraged and major emphasis is placed on

122 experimental methodology. Guest lecturers provide original preparations for  
123 demonstration, discussion, and direct laboratory experimentation in their areas of special  
124 interest and expertise. Each lecturer provides a supplementary reading list and several  
125 background papers or reviews that students are encouraged to read before each lecture.  
126 Students are also provided with detailed protocols for all laboratory experiments to  
127 facilitate the direct transfer of their cutting-edge training in the course to their home labs.  
128 If requested, students can also take novel genetic and molecular reagents that are  
129 rapidly advancing this field back with them to their own laboratories.

130

131 The material provided by instructors in lectures and laboratory exercises is  
132 supplemented by evening seminars that provide specific information on the current  
133 status of research in the invited speakers' area of expertise. Speakers often spend many  
134 hours informally discussing the participants' experiments at the course in relation to their  
135 current research interests. Daily formal and informal discussions between students,  
136 faculty, and invited speakers on the finer points of the techniques and concepts being  
137 taught in each course are a valuable source of intellectual stimulation. These  
138 discussions also allow the instructors and lecturers to provide insight and advice on how  
139 to address the specific problems being encountered by students in their own research at  
140 home. These facets of the program all contribute to the total immersion of the  
141 participants in the subject. The presence of visiting experts for each area of the course  
142 allow for technical training at a depth that is not possible in other courses and  
143 workshops. Participants are able to focus their attention on the scope of the course  
144 without the distraction of other responsibilities, promoting full immersion in the relevant  
145 methodologies and concepts.

146

147 The daily schedule of the *Drosophila* Neurobiology Course is designed such that

148 students spend most of their time performing hands-on laboratory activities to  
149 consolidate information they learned during seminars about cutting-edge research and  
150 lectures of basic neurobiological, genetic, developmental, molecular and behavioral  
151 concepts. Typically, students receive two lectures in the morning: one on basic  
152 concepts, followed by one on research techniques. Students are subsequently in the lab  
153 all afternoon and into the evening. Approximately half of the evenings of the course have  
154 additional lectures designed to expose students to exciting contemporary research in  
155 *Drosophila* neurobiology, and provide perspective on how current work complements  
156 research in other model organisms. The overall three-week schedule is formulated so  
157 that students first learn the basic neurodevelopmental and genetic concepts prior to  
158 learning physiology, sensory systems, simple behavior, and finally complex behavior.  
159 The twelve students accepted to the course are encouraged to think independently and  
160 use cooperative learning to maximize their own and one another's learning.

161

162 A central goal of the course is to expose students to techniques that can be readily  
163 implemented at their home institution. The course covers a broad range of techniques,  
164 such as  $\text{Ca}^{2+}$  imaging, neuromuscular junction electrophysiology, and behavioral  
165 analysis using cutting-edge genetic tools. More recently, Do-it-yourself (DIY)  
166 methodologies, such as 3D printing for constructing behavioral systems, has  
167 encouraged creative approaches for understanding the circuits and molecules that  
168 regulate physiology and behavior [23, 24]. The potential for students to establish similar  
169 DIY systems at their home institutions is emphasized, thereby increasing the impact of  
170 these techniques taught at the course.

171

172 **Admissions and recruitment**

173 Applications are open to candidates at any stage in their postgraduate career from  
174 academia and industry within the United States and from overseas. Participants are  
175 selected by the course instructors on the basis of several criteria including quality of  
176 proposed research, demonstrated need for training in a specific research area,  
177 institutional/community impact of training, national versus international reach, US  
178 underrepresented minority (URM) status, breadth of representation of scientific  
179 approaches, and gender balance. Faculty make efforts to select multiple stages of  
180 trainees, ranging from graduate students to senior investigators. This distribution offers  
181 several distinct advantages: students and fellows often benefit from working closely with  
182 more mature advanced scientists in an informal setting, particularly in terms of learning  
183 approaches and priorities. These interactions have consistently generated a dynamic  
184 and stimulating environment that facilitates peer-to-peer mentorship and cohort cohesion  
185 that is central to the objectives of the course.

#### 186 **Curriculum selection and evaluation**

187 The course curriculum is determined by the course instructors, and progress is  
188 monitored by the senior administrative staff through discussion and evaluation during  
189 and after each course with faculty, students, and guest lecturers (including former  
190 instructors). Over the decades of the course, the curriculum and format have changed  
191 dramatically, often to reflect the current focus of the field and state-of-the-art genetic  
192 technology. For example, the initial years of the course were intensely focused on  
193 genetic mapping, consistent with the common approach of mutagenesis-based screens  
194 in the 1980's [25]. This then changed during the early 2000's into a format with separate  
195 teaching modules on development, physiology, and behavior. More recently, the format  
196 has shifted to integrative laboratories that are not separated by research area. There



197 has also been a recent emphasis on circuit dissection and implementation of state-of-  
198 the-art genetic tools for manipulating gene expression and neuronal function.

### 199 **Data collection and outcomes analysis**

200 Each year, students complete anonymous course evaluation forms at the end of the  
201 course with the primary aim of using the feedback to continue improving the quality of  
202 the course. The course undoubtedly impacts other participants, including instructors and  
203 teaching assistants. While impact and satisfaction assessment of these groups would be  
204 highly valuable, the metrics for determining these aspects is complex, and much of these  
205 data have not been collected. Therefore, our analysis focuses on outcomes for trainees.  
206 All data collection, analysis and presentation was performed in accordance with Cold  
207 Spring Harbor Laboratories IRB Protocol 17-019.

208

## 209 **RESULTS AND DISCUSSION**

### 210 **Informal assessment of the course**

211 To a large degree, queries of course impact come from informal interactions or feedback  
212 requests to former participants. These queries are undoubtedly biased, as the requests  
213 are largely made to senior faculty who have remained in the field. However, the degree  
214 to which many of these former students credit the class with playing a critical role in their  
215 education was notable. For example, Claude Desplan (Class of '85) stated, 'This was a  
216 very long time ago, but I sincerely think that it has changed my perception of the world of  
217 Science.' In addition, nearly all respondents described how the course provided the  
218 unique opportunity to interact with leading senior scientists. Leslie Voshall (Class of '91)  
219 stated, 'The opportunity to mingle with world-class scientists in an informal setting was  
220 matchless. That year, I had the chance to interact with Seymour Benzer, who provided  
221 major input into my thesis work on biological clocks.' Finally, respondents described how  
222 the course developed a sense of community that included students and encouraged

223 scientific creativity. Joel Levine (Class of '95) stated 'it left me with a sense that I was  
224 part of a culture and that almost anything is possible with the fly.'

225

## 226 **Course Participants**

227 Admission to the course is competitive, with an average acceptance rate of  
228 approximately 30% over the last nine years. From 2008-2016, the course typically had  
229 12 students from diverse career stages (Table 1). The majority of students (63%) were  
230 doctoral trainees, with an additional 27% postdoctoral trainees and 9.4% senior  
231 scientists. The course has also historically maintained gender and geographic diversity,  
232 with a nearly equal male:female ratio, and 32% of students coming from laboratories that  
233 are outside of the United States.

234

## 235 **Instructors and Lectures**

236 The course faculty is comprised of researchers who are active in fly genetics,  
237 neurodevelopment, physiology, and behavior. The course is led by three to four  
238 instructors (organizers), who collaboratively design the course syllabus, plan the course  
239 schedule, and invite suitable lecturers based on current *Drosophila* neurobiology  
240 research and student feedback. Each year between 2008 and 2011, approximately  
241 sixteen lecturers gave both seminars and laboratory sessions, whereas an additional  
242 ~eight lecturers gave evening seminars on cutting-edge research in their laboratories.  
243 Lecturers formed a cross section of the *Drosophila* community, coming from the  
244 institutions in the United States (83.6%) and outside the US (16.4%). They represent  
245 primarily research universities (61.2%) and research institutes (37.7%), but also  
246 government (0.9%) and teaching colleges (0.9%). A range of career stages are  
247 represented from full professors (12.93%) and tenure track faculty (58.7%) to  
248 postdoctoral fellows graduate students and technicians (33.6%). Gender balance was

249 actively encouraged in recruitment of course lecturers, instructors and TAs, with an  
250 overall 60.3% male:39.7% female ratio across the 8 years analyzed.

251

## 252 **Student Satisfaction**

253 The perceived impact of the course on students was quantified through a standardized  
254 questionnaire solicited each year from 2012-2016. The survey was designed to measure  
255 both personal satisfaction and the perceived contribution of the course to the trainees'  
256 scientific career. Evaluation sheets were typically circulated on the last day of the course  
257 and students were encouraged (but not required) to complete and return the evaluations  
258 before they departed from CSHL. Importantly, evaluations were handwritten and  
259 completely anonymous. Each evaluation included a scoring system in response to  
260 questions about different aspects of the course: 1 (needs improvement) - 5  
261 (exceptional). Table S1 includes a summary of average scores for the course since  
262 2012. Evaluations reveal a clear level of satisfaction amongst each student class upon  
263 completion of the course. While enthusiasm for the course and points of strength vary  
264 from year to year, students expressed strong overall enthusiasm for all aspects of the  
265 course, with all areas averaging a score of 4.1 (out of 5) or greater (Table 2). On  
266 average, the highest scores were obtained for helpfulness of instructors, receiving an  
267 average score of 4.88.

268

## 269 **Long-term Qualitative Impacts**

270 In total, more than 300 trainees have participated in the course over its 36 year history.  
271 We assessed longer-term impacts by 1) soliciting feedback from alumni in previous  
272 years of the course and 2) tracking of careers of former students.

273

274 We solicited feedback from alumni from 1996 to 2015 and asked how the course  
275 contributed to the individual's intellectual development, technical expertise, publications,  
276 as well as impact on the field as a whole. In all, 85 alumni responded in full to the  
277 survey. The results of this survey reveal that the majority of students found the course to  
278 be helpful for their career (87%; Table 2). In addition, the vast majority reported that the  
279 course helped initiate new research directions (78%; Table 3), and was a highlight of  
280 their scientific career (95%). The high satisfaction with the course is indicative of  
281 substantive and long-lasting positive impact on career development.

282

283 The success of the course can also be measured by assessing the career trajectories of  
284 alumni. An exhaustive internet search of publicly available information was conducted to  
285 identify the current positions of course graduates from 1983-2016 (Fig 1). We were able  
286 to confirm the career status of 287 former students of the course. This revealed that 64%  
287 are currently in academic faculty positions with 55% of identified course alumni in tenure  
288 track positions. This number is remarkably high compared to recent estimates of  
289 success in obtaining an academic faculty position. In the United States, an estimated  
290 65% of graduate students in biomedical fields move on to post-docs, and only 10-13%  
291 secure faculty positions [26]. In this course, a relatively small percentage of graduates  
292 (29 students, 9%) obtained industry research positions, likely indicative of the course  
293 focus on *Drosophila* basic science research and student success in obtaining tenure  
294 track positions. Importantly, alumni also showed a diverse set of non-research careers;  
295 examples included scientific journal editors, teachers, and entrepreneurs. The long-term  
296 impact on student success is indicative of a high return on investment, both in terms of  
297 student time and scientific funding. Further, while difficult to quantify, it is likely that the  
298 course's effectiveness extends beyond alumni as they were likely to share their course  
299 training with individuals in their local scientific communities. The fact that a large number

300 of respondents indicated that publications could be attributed to taking the course  
301 suggests that there was indeed transfer of knowledge to local communities that was  
302 effectively translated into observable research outputs. To this point, 90% of  
303 respondents confirmed that at least 2 publications could be attributed to taking the  
304 course (Table 4).

305

306 Beyond assisting the careers of individual students, the course is uniquely positioned to  
307 provide training opportunities to those with limited access to research resources. While  
308 many training opportunities - including National Institutes of Health NRSA fellowships -  
309 strongly consider training environment, this course focuses on providing access to  
310 students from diverse geographic and scientific backgrounds. The ability to recruit and  
311 train students from a wide range of scientific and cultural backgrounds has the potential  
312 to extend neuroscience training to communities that are underrepresented in scientific  
313 funding. From 2008 until the present, the course has steadily increased the numbers of  
314 students from URM backgrounds (Table 1). In recent years (2015-present), special  
315 efforts have been made to recruit students and lecturers who teach at URM serving  
316 institutions. This approach provides the course with a way to extend *Drosophila*  
317 neuroscience into underserved communities and maximize the social and scientific  
318 impact of the course.

319

### 320 **The role of selection bias in outcomes analysis**

321 Although the data obtained from previous course participants clearly indicates that the  
322 course is associated with future success in academia, we acknowledge that biases likely  
323 contribute to this association. For example, the applicants to this program may be from a  
324 specific pool of researchers who have knowledge of the course and are motivated to  
325 apply to a course, which removes them from their research for nearly an entire month in

326 the summer. Moreover, although careful consideration is given to ensuring the  
327 participants chosen to attend the course are balanced in terms of geographical, scientific  
328 and cultural diversity, selection of the candidates may favor researchers who would have  
329 been successful in the absence of taking the course. At this time, it is not possible to  
330 determine how these biases contribute to the success of the course participants.  
331 However, future analysis that compares course participants to those not selected to  
332 participate in the course may elucidate some of these concerns. Nevertheless, the  
333 analysis highlighting long-term student success clearly makes it likely that connections  
334 established during the course have a lasting impact on the scientific community.

335

### 336 **Outlook for the future**

337 The CSHL *Drosophila* Neurobiology course has demonstrated remarkable success over  
338 more than three decades. This likely reflects both a general effectiveness of the  
339 intensive short summer course format for postgraduate researchers as well as the  
340 specific approaches utilized by this course. In particular, the flexible curriculum defined  
341 by rotating organizers, instructors, and laboratories, has ensured that cutting-edge  
342 research and techniques are consistently incorporated over the multi-decade duration of  
343 the course. Moving forward, we plan to continue this innovation by investing in growing  
344 areas of research. For example, future iterations of the course are likely to emphasize  
345 computational approaches to neuroscience, functional imaging, automated behavioral  
346 data acquisition, and quantitative analysis of animal behavior. In addition, we will  
347 increase the emphasis on DIY approaches to encourage students to develop creative  
348 solutions to investigate the mechanisms that underlie brain physiology and behavior.

349

350 Finally, we hope to leverage the success of this course to extend beyond the reach of  
351 CSHL. For example, forming collaborations with faculty outside CSHL to extend course

352 laboratory modules into undergraduate curriculums will significantly broaden and  
353 enhance the impact of the course. Indeed, recent participants at the course have  
354 adapted CSHL modules for use in undergraduate education and these modules are now  
355 published and freely available [27–29]. Finally, generation of publicly accessible protocol  
356 videos will enhance the broader impact of this course. These points of emphasis,  
357 combined with incorporating rapidly improving genetic technology in the fly, will allow this  
358 course to remain current and innovative into the future.

359

## 360 **Conclusions**

361 *Drosophila melanogaster* is uniquely suited to teach fundamental principles in  
362 neuroscience research. The amenability of the model to laboratory manipulation and its  
363 short generation time allow for the efficient implementation of cutting-edge genetic  
364 technology for investigating development, physiology, and behavior in a short-course  
365 format. This manuscript provides an overview of the course curriculum and structure. In  
366 addition, we provide quantitative analyses which reveal that the *Drosophila* Neurobiology  
367 Course has experienced remarkable success in terms of student satisfaction and career  
368 outcomes. The active emphasis on selecting students from diverse backgrounds further  
369 promotes greater scientific access in the field, gender equality, and success for  
370 underrepresented minorities. Thus, our findings suggest that courses such as the one  
371 described here have the ability to dramatically encourage scientific career success,  
372 broader dissemination of cutting-edge research, and positive social impact in the global  
373 science community.

374

## 375 **Acknowledgments**

376 We would like to thank the CSHL staff, and the students, lecturers and teaching  
377 assistants that participated in the *Drosophila* Neurobiology Course. We would also like to

378 extend a special thank-you to past course instructors Kate O'Connor-Giles (Brown  
379 University), Adrian Rothenfluh (University of Utah) and Greg Macleod (Florida Atlantic  
380 University) for assistance with an early version of portions of this text. This work was  
381 funded by the National Science Foundation Division of Integrative Organismal Systems  
382 (NSF IOS 1523125) and National Institute for Drug Abuse (NIDA R13DA034437) and  
383 NSF awards 165674 and 146465 to ACK.

384

### 385 **Works Cited**

- 386 1. Kohwi M, Doe CQ (2013) Temporal fate specification and neural progenitor  
387 competence during development. *Nat Rev Neurosci* 14:823–38. doi:  
388 10.1038/nrn3618
- 389 2. Evans TA (2016) Embryonic axon guidance: insights from *Drosophila* and  
390 other insects. *Curr Opin Insect Sci* 18:11–16. doi:  
391 10.1016/j.cois.2016.08.007
- 392 3. Frolov R V, Bagati A, Casino B, Singh S (2012) Potassium channels in  
393 *Drosophila*: historical breakthroughs, significance, and perspectives. *J*  
394 *Neurogenet* 26:275–290. doi: 10.3109/01677063.2012.744990
- 395 4. Harris KP, Littleton JT (2015) Transmission, development, and plasticity of  
396 synapses. *Genetics* 201:345–375. doi: 10.1534/genetics.115.176529
- 397 5. Sokolowski MB (2001) *Drosophila*: genetics meets behaviour. *Nat Rev*  
398 *Genet* 2:879–890.
- 399 6. Vosshall LB (2007) Into the mind of a fly. *Nature* 450:193–197. doi:  
400 10.1038/nature06335
- 401 7. Bellen HJ, Tong C, Tsuda H (2010) 100 years of *Drosophila* research and



- 402 its impact on vertebrate neuroscience: a history lesson for the future. *Nat*  
403 *Rev Neurosci* 11:514–22. doi: 10.1038/nrn2839
- 404 8. Kazama H, Wilson RI (2008) Homeostatic matching and nonlinear  
405 amplification at identified central synapses. *Neuron* 58:401–413. doi:  
406 S0896-6273(08)00184-0 [pii]10.1016/j.neuron.2008.02.030
- 407 9. Venken KJ, Simpson JH, Bellen HJ (2011) Genetic manipulation of genes  
408 and cells in the nervous system of the fruit fly. *Neuron* 72:202–230. doi:  
409 10.1016/j.neuron.2011.09.021
- 410 10. Zwart MF, Pulver SR, Truman JW, et al. (2015) Selective Inhibition  
411 Mediates the Sequential Recruitment of Motor Pools. *Neuron* 91:615–628.  
412 doi: 10.1016/j.neuron.2016.06.031
- 413 11. Aso Y, Sitaraman D, Ichinose T, et al. (2014) Mushroom body output  
414 neurons encode valence and guide memory-based action selection in  
415 *Drosophila*. *Elife* 3:e04580. doi: 10.7554/eLife.04580
- 416 12. Seidner G, Robinson JE, Wu M, et al. (2015) Identification of Neurons with  
417 a Privileged Role in Sleep Homeostasis in *Drosophila melanogaster*. *Curr*  
418 *Biol* 25:2928–2938. doi: 10.1016/j.cub.2015.10.006
- 419 13. Vogelstein JT, Park Y, Ohyama T, et al. (2014) Discovery of brainwide  
420 neural-behavioral maps via multiscale unsupervised structure learning.  
421 *Science* (80- ) 344:386–392. doi: 10.1126/science.1250298
- 422 14. Klein M, Afonso B, Vonner AJ, et al. (2015) Sensory determinants of  
423 behavioral dynamics in *Drosophila thermotaxis*. *Proc Natl Acad Sci U S A*  
424 112:E220-9. doi: 10.1073/pnas.1416212112

- 425 15. Stavropoulos N, Young MW (2011) Insomniac and cullin-3 regulate sleep  
426 and wakefulness in drosophila. *Neuron* 72:964–976. doi:  
427 10.1016/j.neuron.2011.12.003
- 428 16. Seelig JD, Jayaraman V (2015) Neural dynamics for landmark orientation  
429 and angular path integration. *Nature* 521:186–191. doi:  
430 10.1038/nature14446
- 431 17. Pulver SR, Griffith LC (2010) Spike integration and cellular memory in a  
432 rhythmic network from Na(+)/K(+) pump current dynamics. *Nat Neurosci*  
433 13:53–59. doi: nn.2444 [pii]10.1038/nn.2444
- 434 18. Patel VL, Branch T, Cimino A, et al. (2005) Participant perceptions of the  
435 influences of the NLM-sponsored woods hole medical informatics course. *J*  
436 *Am Med Informatics Assoc.* doi: 10.1197/jamia.M1662
- 437 19. Davidson C, Creson D (1971) A summer program for minority students in a  
438 medical setting--a progress report. *Tex Rep Biol Med* 29:443–50.
- 439 20. Fallon JF (2002) How serendipity shaped a life: An interview with John W.  
440 Saunders, Jr. *Int. J. Dev. Biol.*
- 441 21. Bridges J, Miller CJ, Kipnis DG (2006) Librarians in the Woods Hole  
442 Biomedical Informatics Course. *Med Ref Serv Q.* doi:  
443 10.1300/j115v25n01\_07
- 444 22. Jan LY, Jan YN (2018) Influences: Cold Spring Harbor summer courses  
445 and *Drosophila melanogaster* neurogenetics. *J Gen Physiol* 150:733–735.  
446 doi: 10.1085/jgp.201812063
- 447 23. Baden T, Chagas AM, Gage G, et al. (2015) Open Labware: 3-D Printing

- 448 Your Own Lab Equipment. PLoS Biol. doi: 10.1371/journal.pbio.1002086
- 449 24. Geissmann Q, Rodriguez LG, Beckwith EJ, et al. (2017) Ethoscopes: An  
450 Open Platform For High-Throughput Ethomics. bioRxiv 113647. doi:  
451 10.1101/113647
- 452 25. St Johnston D (2002) The art and design of genetic screens: *Drosophila*  
453 *melanogaster*. Nat Rev Genet 3:766–778. doi: 10.1038/nrg751
- 454 26. Powell K (2015) The future of the postdoc. Nature 520:144–147. doi:  
455 10.1136/vr.117.21.563
- 456 27. McKellar Claire, E; Wytenbach, Robert A (2017) A Protocol Demonstrating  
457 60 Different *Drosophila* Behaviors in One Assay. J Undergrad Neurosci  
458 Educ 15:A110–A116.
- 459 28. Titlow JS, Johnson BR, Pulver SR (2015) Light Activated Escape Circuits:  
460 A Behavior and Neurophysiology Lab Module using *Drosophila*  
461 Optogenetics. J Undergr Neurosci Educ 13:A166-73.
- 462 29. Scaplen KM, Mei NJ, Bounds HA, et al. (2019) Automated real-time  
463 quantification of group locomotor activity in *Drosophila melanogaster*. Sci  
464 Rep. doi: 10.1038/s41598-019-40952-5
- 465
- 466
- 467

468 **Figure 1.**

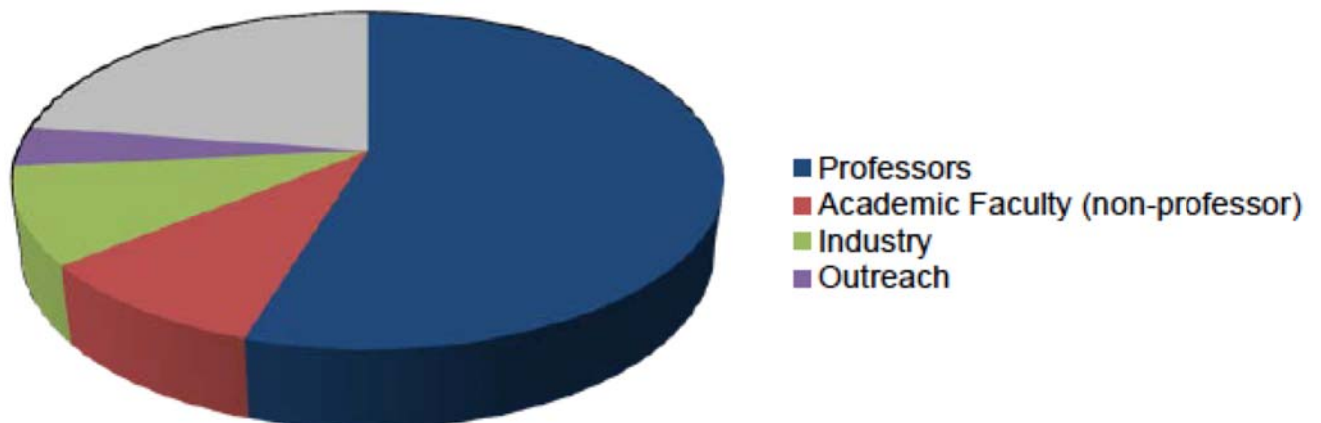

469  
470 **Figure 1. Current professional status of course graduates.**

471 In total, 55% of eligible course alumni received professor appointments, while 64%  
472 hold academic appointments (including non-professor appointments). 9% of alumni  
473 work in industry, 4% in outreach. Grey (23%) represents other professional  
474 positions.

475  
476  
477

478 **Table 1.**

|                 | <u>2008</u> | <u>2009</u> | <u>2010</u> | <u>2011</u> | <u>2012</u> | <u>2013</u> | <u>2014</u> | <u>2015</u> | <u>2016</u> | <b><u>TOTAL</u></b> |
|-----------------|-------------|-------------|-------------|-------------|-------------|-------------|-------------|-------------|-------------|---------------------|
| Instructors     | 4           | 3           | 3           | 3           | 3           | 3           | 3           | 3           | 3           |                     |
| Lecturers       | 29          | 21          | 17          | 21          | 14          | 18          | 19          | 22          | 26          |                     |
| Assistants      | 5           | 5           | 6           | 7           | 4           | 4           | 3           | 3           | 10          |                     |
| Applicants      | 52          | 34          | 24          | 23          | 43          | 42          | 32          | 32          | 36          | <b>319</b>          |
| <b>Students</b> | <b>11</b>   | <b>12</b>   | <b>12</b>   | <b>11</b>   | <b>12</b>   | <b>12</b>   | <b>12</b>   | <b>12</b>   | <b>12</b>   | <b>106</b>          |
| Grad Stud       | 7           | 6           | 7           | 8           | 8           | 10          | 9           | 6           | 6           | <b>67</b>           |
| Postdoc         | 2           | 3           | 4           | 3           | 3           | 2           | 3           | 4           | 5           | <b>29</b>           |
| PI/Sen Sci      | 2           | 3           | 1           | -           | 1           | -           | -           | 2           | 1           | <b>10</b>           |
| Gender          | 6m/5f       | 5m/7f       | 6m/6f       | 5m/6f       | 6m/6f       | 5m/7f       | 7m/5f       | 6m/6f       | 5m/7f       | <b>51m/55f</b>      |
| US (%)          | 7(64%)      | 9(75%)      | 6(50%)      | 6(55%)      | 9(75%)      | 9(75%)      | 8(67%)      | 9(75%)      | 9(75%)      | <b>72(68%)</b>      |
| URM             | 1           | 1           | 1           | 1           | 1           | 2           | na          | 2           | 3           | <b>12(17%)</b>      |

479

480 **Table 1: Makeup of course students, assistants and faculty from 2008-2016.** The  
 481 number instructors (Course organizers), lecturers, teaching assistants, applications, and  
 482 students for each year from 2008-2016. The breakdown of students (bold) between  
 483 grad student, postdoc, and PI/senior scientist, as well as gender. The percentage of  
 484 students from the US. URM denotes US underrepresented minority.

485

486

487

488

489

490

491

492

493

494

495

496

497

498

499

500

501

502 **Table 2.**

|                                                            | <b>2012</b> | <b>2013</b> | <b>2014</b> | <b>2015</b> | <b>2016</b> |
|------------------------------------------------------------|-------------|-------------|-------------|-------------|-------------|
| In general, did the course meet your needs /expectations?  | 4.5         | 4.6         | 4.1         | 4.8         | 4.9         |
| Were the lecture topics well chosen?                       | 4.5         | 4.5         | 4.1         | 5.0         | 4.8         |
| Was the level of the lectures appropriate?                 | 4.3         | 4.7         | 4.5         | 4.8         | 4.8         |
| Were the presentations clear?                              | 4.2         | 4.5         | 4.1         | 4.5         | 4.6         |
| Were the instructors helpful?                              | 4.9         | 4.9         | 4.6         | 5.0         | 5.0         |
| Was the selection of lab exercises appropriate?            | 4.1         | 4.5         | 3.6         | 4.7         | 4.8         |
| Was there sufficient/too much supervision of the lab?      | 4.3         | 4.5         | 4.2         | 4.5         | 4.8         |
| Were the labs well enough equipped?                        | 3.9         | 4.4         | 4.2         | 4.3         | 4.8         |
| What was the utility and quality of the written protocols? | 3.8         | 4.4         | 3.4         | 4.3         | 4.5         |
| How was the course work load?                              | 4.5         | 4.3         | 4.4         | 4.4         | 4.8         |

503

504 **Table 3: Student course evaluations from 2012-2016.** Average scores from course  
505 evaluations over a five-year period. Scale: 1-Poor->5-Excellent.

506

507 **Table 3.**

|                                                                                      | Strongly Agree | Agree     | Neutral   | Disagree  | Strongly Disagree |
|--------------------------------------------------------------------------------------|----------------|-----------|-----------|-----------|-------------------|
| The course helped me achieve my next career transition.                              | 41             | 31        | 11        | 0         | 1                 |
| The course had a positive impact on my scientific career as a whole.                 | 71             | 13        | 1         | 0         | 0                 |
| The course helped me initiate a new research direction.                              | 39             | 29        | 15        | 1         | 1                 |
| The course taught me new techniques that were subsequently applicable to my research | 56             | 24        | 2         | 0         | 2                 |
| The course was a highlight in my scientific career.                                  | 56             | 24        | 2         | 0         | 2                 |
| The course has a positive impact on the broader biological research community.       | 62             | 19        | 3         | 1         | 0                 |
|                                                                                      | <b>YES</b>     | <b>NO</b> |           |           |                   |
| Do you still work in this scientific area?                                           | 70             | 12        |           |           |                   |
|                                                                                      | <b>10+</b>     | <b>~7</b> | <b>~4</b> | <b>~2</b> | <b>0</b>          |
| Number of research publications that could be attributed to taking this course?      | 4              | 10        | 14        | 49        | 7                 |
|                                                                                      | <b>3+</b>      | <b>3</b>  | <b>2</b>  | <b>1</b>  | <b>0</b>          |
| Number of patents that could be attributed to taking this course?                    | 1              | 0         | 1         | 3         | 72                |

508

509 **Table 3. Long-term impact assessment of students from 1996-2015.** Previous  
 510 students were contacted and asked about the impact the course had on the career over  
 511 the summer of 2016. The number of responses for the 85 recipients for each category  
 512 are listed.
